# Supplementary material
Source: PubMed Central journal article supplement (PMC4639406)
Supplement: NIHMS733089-supplement-01.pdf [file NIHMS733089-supplement-01.pdf]

# Robust Scoring Functions for Protein-Ligand Interactions with Quantum Chemical Charge Models

*Jui-Chih Wang,<sup>a</sup> Jung-Hsin Lin,<sup>b,c,d,\*</sup> Chung-Ming Chen,<sup>a</sup> Alex L. Perryman,<sup>e</sup> Arthur J. Olson<sup>e</sup>*

<sup>a</sup> Institute of Biomedical Engineering, National Taiwan University, Taipei, Taiwan. <sup>b</sup> Division of Mechanics, Research Center for Applied Sciences, Academia Sinica, Taiwan. <sup>c</sup> School of Pharmacy, National Taiwan University, Taipei, Taiwan. <sup>d</sup> Institute of Biomedical Sciences, Academia Sinica, Taiwan. <sup>e</sup> Department of Molecular Biology, The Scripps Research Institute, La Jolla, USA.

To whom correspondence should be addressed. J.-H. Lin, Tel: +8862-27823212 ext 886. Fax: +8862-27823060. E-mail: [jlin@ntu.edu.tw](mailto:jlin@ntu.edu.tw)

## Supporting Information

**Table S1.** The outliers of the RGG model

| PDB  | $\Delta G_{\text{exp.}}$ | $\Delta G_{\text{pred.}}$ | Protein name                        |
|------|--------------------------|---------------------------|-------------------------------------|
| 1adc | -6.42                    | -15.94                    | ALCOHOL DEHYDROGENASE               |
| 1apt | -12.82                   | -8.82                     | PENICILLOPEPSIN                     |
| 1bzm | -8.23                    | -4.72                     | CARBONIC ANHYDRASE I                |
| 1cbx | -8.65                    | -7.03                     | CARBOXYPEPTIDASE A                  |
| 1cil | -12.94                   | -6.44                     | CARBONIC ANHYDRASE II               |
| 1cim | -12.1                    | -5.70                     | CARBONIC ANHYDRASE II               |
| 1cin | -11.97                   | -6.13                     | CARBONIC ANHYDRASE II               |
| 1cnw | -10.6                    | -3.04                     | CARBONIC ANHYDRASE II               |
| 1cnx | -10.11                   | -4.05                     | CARBONIC ANHYDRASE II               |
| 1cny | -10.78                   | -2.41                     | CARBONIC ANHYDRASE II               |
| 1dih | -7.83                    | -12.49                    | DIHYDRODIPICOLINATE REDUCTASE       |
| 1ebg | -14.76                   | -9.51                     | ENOLASE                             |
| 1hsl | -9.95                    | -6.34                     | HISTIDINE BINDING PROTEIN           |
| 1lde | -9.41                    | -5.41                     | ALCOHOL DEHYDROGENASE               |
| 1ldy | -11.06                   | -4.16                     | ALCOHOL DEHYDROGENASE               |
| 1lyb | -15.57                   | -9.82                     | CATHEPSIN D                         |
| 1okl | -12.39                   | -5.73                     | CARBONIC ANHYDRASE II               |
| 1pgp | -7.77                    | -3.62                     | 6-PHOSPHOGLUCONATE<br>DEHYDROGENASE |
| 1sbp | -9.44                    | -5.78                     | SULFATE-BINDING PROTEIN             |
| 1stp | -18.39                   | -10.02                    | STREPTAVIDIN                        |
| 1tmn | -9.95                    | -8.37                     | THERMOLYSIN                         |
| 2xis | -7.94                    | -3.48                     | XYLOSE ISOMERASE                    |
| 3er3 | -9.68                    | -4.11                     | ENDOTHIAPEPSIN                      |
| 3er5 | -12.35                   | -10.16                    | ENDOTHIAPEPSIN                      |
| 4dfr | -13.22                   | -9.67                     | DIHYDROFOLATE REDUCTASE             |
| 5tmn | -10.96                   | -6.86                     | THERMOLYSIN                         |
| 6cpa | -15.71                   | -8.41                     | CARBOXYPEPTIDASE A                  |
| 7cpa | -19.03                   | -9.21                     | CARBOXYPEPTIDASE A                  |
| 9aat | -11.21                   | -7.08                     | ASPARTATE AMINOTRANSFERASE          |

**Table S2.** The outliers of the RAP model

| PDB  | $\Delta G_{\text{exp.}}$ | $\Delta G_{\text{pred.}}$ | Protein name                  |
|------|--------------------------|---------------------------|-------------------------------|
| 1adb | -11.45                   | -16.60                    | ALCOHOL DEHYDROGENASE         |
| 1adc | -6.42                    | -16.08                    | ALCOHOL DEHYDROGENASE         |
| 1ajv | -10.59                   | -14.94                    | HIV-1 PROTEASE                |
| 1apt | -12.82                   | -9.24                     | PENICILLOPEPSIN               |
| 1bra | -2.49                    | -6.18                     | TRYPSIN                       |
| 1cil | -12.94                   | -6.98                     | CARBONIC ANHYDRASE II         |
| 1cim | -12.1                    | -6.34                     | CARBONIC ANHYDRASE II         |
| 1cin | -11.97                   | -6.73                     | CARBONIC ANHYDRASE II         |
| 1cnw | -10.6                    | -3.78                     | CARBONIC ANHYDRASE II         |
| 1cnx | -10.11                   | -4.59                     | CARBONIC ANHYDRASE II         |
| 1cny | -10.78                   | -3.13                     | CARBONIC ANHYDRASE II         |
| 1dih | -7.83                    | -12.87                    | DIHYDRODIPICOLINATE REDUCTASE |
| 1ldy | -11.06                   | -4.48                     | ALCOHOL DEHYDROGENASE         |
| 1lyb | -15.57                   | -9.88                     | CATHEPSIN D                   |
| 1okl | -12.39                   | -6.35                     | CARBONIC ANHYDRASE II         |
| 1sre | -5.46                    | -8.87                     | STREPTAVIDIN                  |
| 1stp | -18.39                   | -9.86                     | STREPTAVIDIN                  |
| 1tnk | -2.03                    | -5.95                     | TRYPSIN                       |
| 1tnl | -2.56                    | -6.79                     | TRYPSIN                       |
| 3er3 | -9.68                    | -5.43                     | ENDOTHIAPEPSIN                |
| 3er5 | -12.35                   | -10.65                    | ENDOTHIAPEPSIN                |
| 6cpa | -15.71                   | -9.45                     | CARBOXYPEPTIDASE A            |
| 7cpa | -19.03                   | -10.38                    | CARBOXYPEPTIDASE A            |

**Table S3.** The outliers of the RRP model

| PDB  | $\Delta G_{\text{exp.}}$ | $\Delta G_{\text{pred.}}$ | Protein name                  |
|------|--------------------------|---------------------------|-------------------------------|
| 1adb | -11.45                   | -16.75                    | ALCOHOL DEHYDROGENASE         |
| 1adc | -6.42                    | -16.04                    | ALCOHOL DEHYDROGENASE         |
| 1ajv | -10.59                   | -14.51                    | HIV-1 PROTEASE                |
| 1bra | -2.49                    | -6.21                     | TRYPSIN                       |
| 1cbx | -8.65                    | -9.09                     | CARBOXYPEPTIDASE A            |
| 1dih | -7.83                    | -12.85                    | DIHYDRODIPICOLINATE REDUCTASE |
| 1ebg | -14.76                   | -13.20                    | ENOLASE                       |
| 1hhj | -9                       | -13.18                    | HISTOCOMPATIBILITY ANTIGEN    |
| 1lde | -9.41                    | -7.04                     | ALCOHOL DEHYDROGENASE         |
| 1lyb | -15.57                   | -9.17                     | CATHEPSIN D                   |
| 1stp | -18.39                   | -9.73                     | STREPTAVIDIN                  |
| 1tmn | -9.95                    | -9.70                     | THERMOLYSIN                   |
| 1tni | -2.32                    | -5.81                     | TRYPSIN                       |
| 1tnj | -2.67                    | -6.21                     | TRYPSIN                       |
| 1tnk | -2.03                    | -5.97                     | TRYPSIN                       |
| 1tnl | -2.56                    | -6.79                     | TRYPSIN                       |
| 4er4 | -9.27                    | -14.01                    | ENDOTHIAPEPSIN                |
| 4hvp | -8.33                    | -12.65                    | HIV-1 PROTEASE                |
| 4tmn | -13.89                   | -13.43                    | THERMOLYSIN                   |
| 6tmn | -6.88                    | -8.33                     | THERMOLYSIN                   |

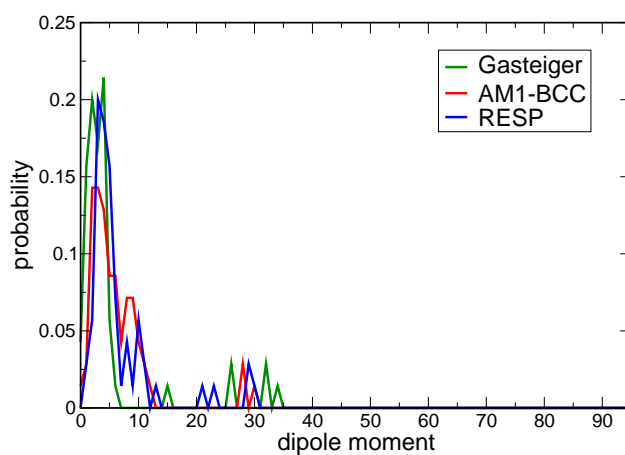

**Figure S1.** The distributions of dipole moments (in unit Debye) of 70 neutral ligands of 189 dataset (from LPDB). The values of dipole moment were calculated by three kinds of atomic charges.

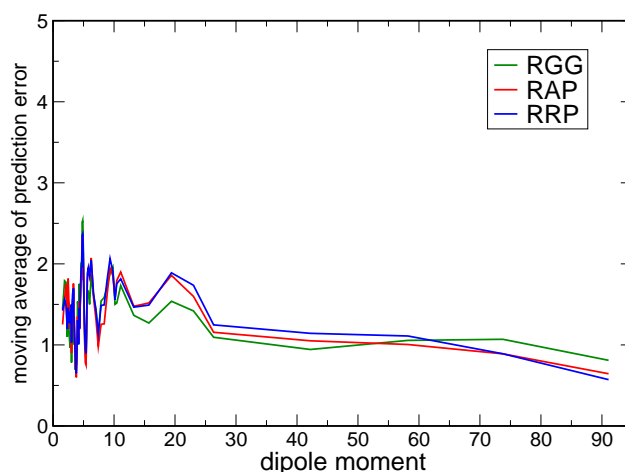

**Figure S2.** Moving average of prediction error versus dipole moment (Debye) of 70 neutral ligands of 189 dataset (from LPDB). The prediction error was deviation between estimated and experimental binding free energy. The values of dipole moment were calculated by RESP atomic charges.

**Table S4.** RMS prediction errors of AutoDock4 scoring functions for neutral ligands in the training set

| scoring function                 | 70 cases | 10 cases <sup>a</sup> |
|----------------------------------|----------|-----------------------|
| AutoDock4 <sup>RGG</sup>         | 1.684    | 1.357                 |
| AutoDock4 <sup>RAP</sup>         | 1.689    | 1.367                 |
| AutoDock4 <sup>RRP</sup>         | 1.709    | 1.456                 |
| original AutoDock4 <sup>GG</sup> | 2.293    | 1.726                 |

<sup>a</sup>These 10 cases are large dipole moment ligands. (Debye > 12.5)

All values of RMS prediction errors are in kcal/mol.
